# Supplementary material
Source: Springer Nature journal article supplement (https://www.springermedizin.de/resource/supplementary/13012_2014_769_MOESM4_ESM.pdf/9630654)
Supplement: MOESM4 [file 9630654]

RAVES [Radiotherapy Adjuvant Vs Early Salvage (Protocol Number: TROG.08.03)] is a multi-centre phase III clinical trial comparing survival and quality of life outcomes for patients at high-risk post prostatectomy who are randomised to have: i) radiotherapy deferred (salvage radiotherapy) until their prostate specific antigen (PSA) begins to rise (common current practice); OR ii) immediate radiotherapy (adjuvant radiotherapy) after surgery (regarded as evidence-based standard of care). This is seen as a very important local trial as, despite international evidence that adjuvant radiotherapy is effective, this practice has not been widely adopted due to urologists' concerns about side effects and overtreatment. The aim of the RAVES trial is to determine whether salvage radiotherapy is as effective as adjuvant radiotherapy and results in improved quality of life.
